# Supplementary material
Source: publisher site journal article supplement (https://www.dovepress.com/article/570006)
Supplement: Supplementary file 1 [file 570006%20Revised%20Supplementary%20Material.docx]

**On-line Supplementary Material**

**Contents**

| **Appendix Table** | **Page** |
| --- | --- |
| - **Definition of postoperative complications** | **1** |
| - **Supplemental Table 1. Surgery information.** | **2-3** |
| - **Supplemental Table 2. Generalized estimating equation model for assessing** | **4** |
| - **Supplemental Figure 1. Vital sign parameters between groups.** | **5** |

**Definition of postoperative complications**

**1. Postoperative pneumonia**: meets the following criteria:

1) Sputum culture positive.

2) Respiratory infection. Patient has received antibiotics for a suspected respiratory infection and met one or more of the following criteria: new or changed sputum, new or changed lung opacities, fever, white blood cell count > 12×109 l-1.

**2. Postoperative pleural effusion**

Chest radiograph demonstrating blunting of the costophrenic angle, loss of sharp silhouette of the ipsilateral hemidiaphragm in upright position, evidence of displacement of adjacent anatomical structures or (in supine position) a hazy opacity in one hemithorax with preserved vascular shadows.

**3. Postoperative acute kidney injury (AKI)**: Defined using the creatinine component of the kidney disease: Improving Global Outcomes (KDIGO) criteria. Meets any of the following:

1) Increase in serum creatinine by ≥ 0.3 mg/dl (≥ 26.5 µmol/l) within 48 hours.

2) Increase in serum creatinine to ≥ 1.5 times baseline, which is known or presumed to have occurred within the prior 7 days.

3) Urine volume <0.5 ml/kg/h for 6 hours.

**Supplemental Table 1.** Surgery information.

| **Variables** | **Zero-balanced ultrafiltration**  **(n=53)** | **Conventional ultrafiltration**  **(n=53)** | ***P*** |
| --- | --- | --- | --- |
| Type of cardiac surgery*, n (%) |  |  | 0.167 |
| Isolated valve replacement | 16 (30.19) | 19 (35.85) |  |
| Multi-valve replacement | 19 (35.85) | 8 (15.09) |  |
| Multi-valve replacement and tricuspid valve repair | 3 (5.66) | 9 (16.98) |  |
| CABG | 4 (7.55) | 5 (9.43) |  |
| CABG and valve replacement | 5 (9.43) | 4 (7.55) |  |
| CHD | 4 (7.55) | 7 (13.20) |  |
| Bentall | 2 (3.77) | 1 (1.89) |  |
| Operation duration, min, median (IQR) | 260.00 (225.00, 300.00) | 250.00 (205.00, 290.00) | 0.363 |
| Operation duration group, n (%) |  |  | 0.548 |
| < 4 hours | 18 (33.96) | 22 (41.51) |  |
| ≥ 4 hours | 35 (66.04) | 31 (58.49) |  |
| CPB duration, min, mean (SD) | 143.43 (45.53) | 137.19 (50.84) | 0.507 |
| CPB duration group, n (%) |  |  | 0.835 |
| < 2 hours | 16 (30.19) | 18 (33.96) |  |
| ≥ 2 hours | 37 (69.81) | 35 (66.04) |  |
| Ultrafiltration capacity, ml, mean (SD) | 2158.49 (912.40) | 1122.64 (541.95) | <0.001 |
| Crystalloid during CBP#, ml, median (IQR) | 3200.00 (2900.00,  3500.00) | 2200.00 (2000.00,  3300.00) | 0.002 |
| Hct (%) during CBP, mean (SD) | 24.95 (2.15) | 25.61 (2.42) | 0.197 |
| Red blood cell, n (%) | 18 (33.96) | 20 (37.74) | 0.112 |
| Plasma, n (%) | 22 (41.51) | 20 (37.74) | 0.691 |
| Cryoprecipitate, n (%) | 3 (5.66) | 1 (1.89) | 0.610 |
| Platelet, n (%) | 3 (5.66) | 1 (1.89) | 0.610 |
| Autologous blood, ml, median (IQR) | 900.00 (800.00, 1000.00) | 1000.00 (800.00, 1000.00) | 0.216 |
| Bleeding volume, ml, median (IQR) | 380.00 (350.00, 400.00) | 380.00 (300.00, 400.00) | 0.344 |
| Urine, ml, median (IQR) | 1200.00 (700.00, 1700.00) | 1000.00 (700.00, 1600.00) | 0.839 |
| Net volume, ml, median (IQR) | 1400.00 (700.00, 2050.00) | 1150.00 (600.00, 1850.00) | 0.495 |
| Net volume during CBP, ml, median (IQR) | 600.00 (0.00, 960.00) | 500.00 (100.00, 790.00) | 0.934 |
| Dexmedetomidine dosage, μg, median (IQR) | 100.00 (84.00, 120.00) | 99.33(80.00, 120.00) | 0.942 |
| Heart recovery, n (%) |  |  | 0.922 |
| Automatic re-beat | 21 (39.62) | 19 (35.85) |  |
| Defibrillation once | 18 (33.96) | 19 (35.85) |  |
| Defibrillation multiple | 14 (26.42) | 19 (35.85) |  |

Summary statistics presented as No. (%) of patients, mean ± SD, or median (quartile 1–quartile 3) for factors, symmetric continuous variables, and skewed continuous variables.

* This included coronary artery bypass grafting surgery conducted on its own or together with other types of surgery, such as the valve replacement.

# All patients received crystalloid.

Abbreviation: CHD, Congenital heart disease; CABG, Coronary artery bypass grafting; CPB, cardiopulmonary bypass; Hct, Hematocrit; IQR, Inter quartile range; SD, standard deviations.

**Supplemental Table 2. Generalized estimating equation model for assessing intervention effect on postoperative MMSE score.**

| **Mini-Mental State Examination score** | **Zero-balanced ultrafiltration**  **(n=53)** | **Conventional**  **ultrafiltration**  **(n=53)** | **Treatment differences between groups**  **(95% CI)** | ***P*** |
| --- | --- | --- | --- | --- |
| Model effect * |  |  |  |  |
| Overall effect, marginal mean | 27.56 ± 3.13 | 26.63 ± 4.41 | 0.79 (-0.14, 1.71) | 0.096 |
| Time |  |  |  | 0.001 |
| Baseline Mini-Mental State Examination score, mean ± SD | 29.21 ± 1.26 | 29.08 ± 1.34 | 0.20 (-0.63, 0.37) | 0.600 |
| Time × intervention interaction |  |  |  | 0.661 |
| 1 month, mean ± SD | 26.79 ± 3.76 | 25.66 ± 5.09 | 0.99 (-0.57, 2.56) | 0.214 |
| 3 months, mean ± SD | 28.32 ± 2.11 | 27.60 ± 3.38 | 0.57 (-4.03, 1.56) | 0.248 |

*A generalized estimating equations model was run to compare Mini-Mental State Examination score between groups, with patients treated by zero-balanced ultrafiltration (intervention) group, time (1 and 3 months after surgery), treatment group × time interaction, and baseline Mini-Mental State Examination score as fixed effects and participant as a clustering variable.

Abbreviations: SD, standard deviations; CI, confidence interval.

**Supplemental Figure 1. Vital sign parameters between groups.**

**
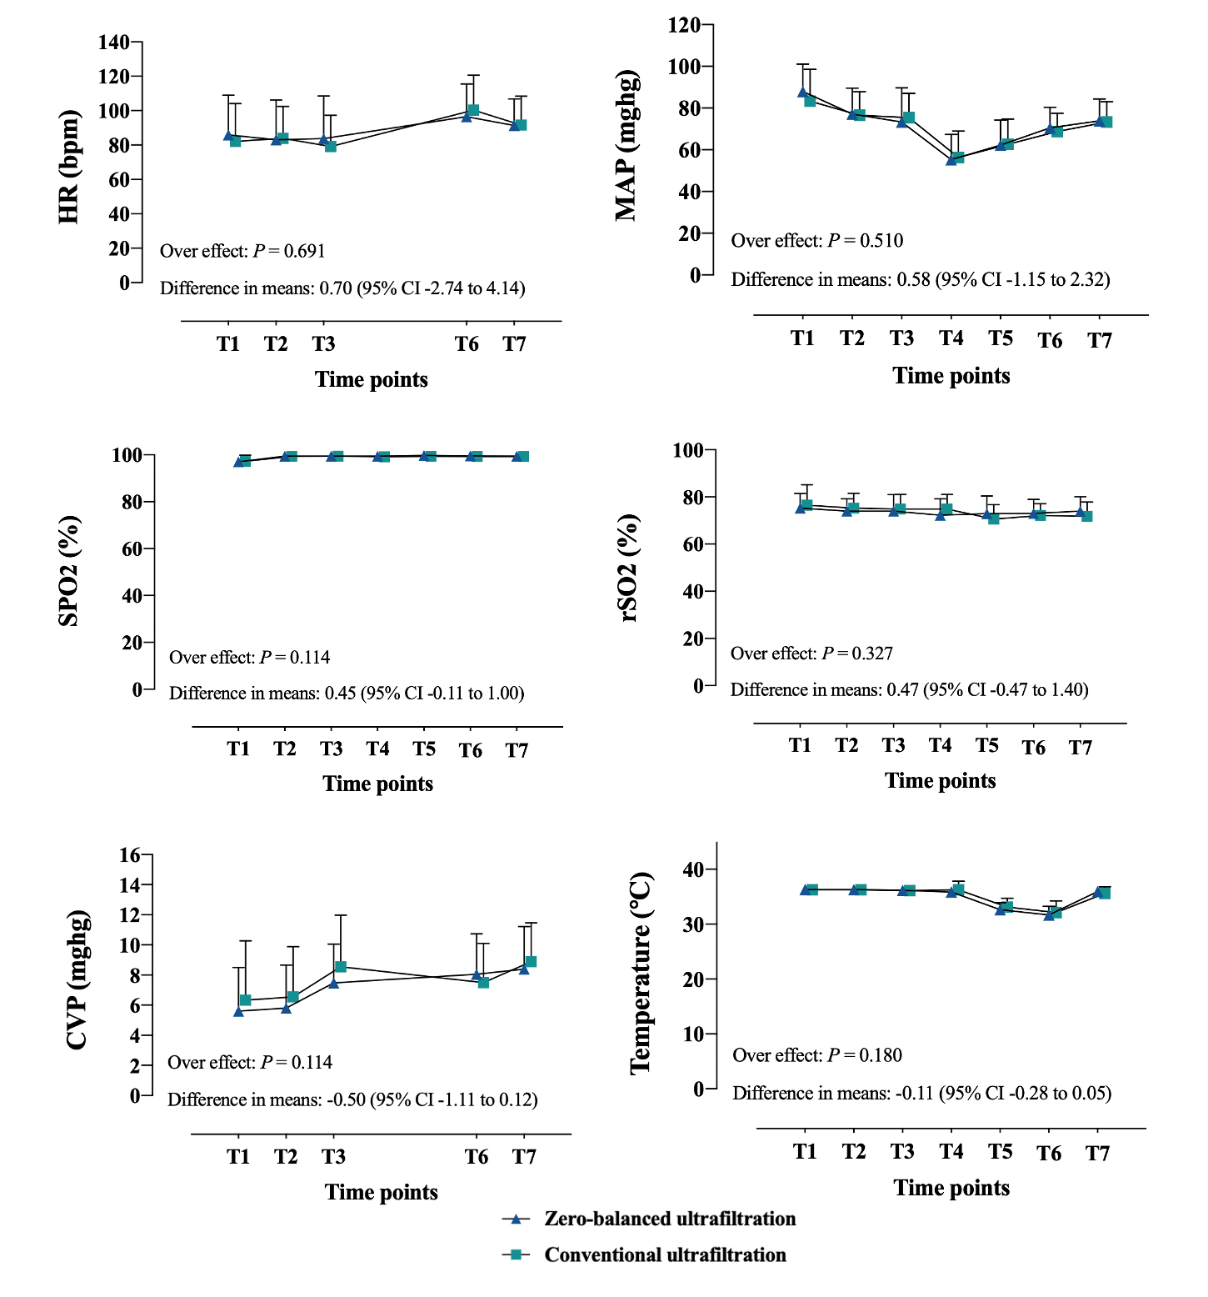
**

Time point: T1, entered the operating room for 5 min; T2, 1 min after tracheal intubation; T3, at skin incision; T4, CPB 10 min; T5, CPB 40 min; T6, 10 min after separation from CPB; T7, during skin closing.

Abbreviations: HR; heart rate; MAP, mean arterial pressure; SPO2, pulse oxygen saturation; rSO2, cerebral oxygen saturation; CVP,Central venous pressure; CI, confidence interval.
